# Supplementary material
Source: HighWire-hosted journal article supplement (https://cmajopen-stage.highwire.org/highwire/filestream/88844/field_highwire_adjunct_files/1/open-2021-0266-2-at.pdf)
Supplement: open-2021-0266-2-at.pdf [file open-2021-0266-2-at.pdf]

Appendix Table 2 – TDF Guide with Definitions Relevant to Breast Cancer Screening Behaviours;  
adapted from Atkins 2017, not all TDF domains included

| <b>TDF Domain</b>                     | <b>Definition/Construct in TDF Guide</b>                                                                                 | <b>Breast Cancer Screening Relevant Definition/Example</b>                                                                                                                                     |
|---------------------------------------|--------------------------------------------------------------------------------------------------------------------------|------------------------------------------------------------------------------------------------------------------------------------------------------------------------------------------------|
| Behavioural Regulation                | Anything aimed at managing or changing objectively observed actions                                                      | <ul style="list-style-type: none"> <li>• Use of prompts serving as a reminder to perform risk assessment or discuss screening</li> </ul>                                                       |
| Beliefs about Capabilities            | Acceptance of the reality about an ability that a person can put to constructive use                                     | <ul style="list-style-type: none"> <li>• Beliefs in capabilities to perform shared decision making</li> <li>• Beliefs in capabilities to explain when/why screening not recommended</li> </ul> |
| Beliefs about Consequences            | Acceptance of the reality about an outcome of a behaviour for a given situation                                          | <ul style="list-style-type: none"> <li>• Beliefs that discussing screening harms will change a woman's decision</li> <li>• Beliefs that a referral to genetics will be declined</li> </ul>     |
| Emotion                               | A complex reaction pattern by which the individual attempts to deal with a significant event (fear, anxiety, stress...)  | <ul style="list-style-type: none"> <li>• Physicians describe emotion surrounding a diagnosis of breast cancer in a prior patient</li> </ul>                                                    |
| Environment context and Resources     | Any circumstance of a person's environment that discourages or encourages the development of skills/abilities            | <ul style="list-style-type: none"> <li>• Risk assessment tools (resource) being cumbersome to use</li> <li>• Breast clinics being easy to refer to</li> </ul>                                  |
| Intentions                            | A conscious decision to resolve to act in a certain way                                                                  | <ul style="list-style-type: none"> <li>• Setting an intention to always behave in a specific way regarding screening (ie to always or never screen)</li> </ul>                                 |
| Knowledge                             | Awareness of the existence of something (knowledge of scientific rationale, task)                                        | <ul style="list-style-type: none"> <li>• Awareness of breast cancer risk factors or screening tools</li> <li>• Awareness/understanding of the benefits and harms of screening</li> </ul>       |
| Reinforcement                         | Increasing the probability of a response by arranging a dependent relationship between the response and a given stimulus | <ul style="list-style-type: none"> <li>• A periodic health review reinforces providers to consider screening</li> </ul>                                                                        |
| Skills                                | Ability or proficiency (skills, competence, interpersonal skills)                                                        | <ul style="list-style-type: none"> <li>• Skills to perform a breast cancer risk assessment</li> <li>• Interpersonal skills for shared decision making</li> </ul>                               |
| Social/Professional Role and Identity | A set of behaviours and personal qualities of an individual in a work setting                                            | <ul style="list-style-type: none"> <li>• Role to perform shared decision making</li> <li>• Role related to genetics / high-risk screening referrals</li> </ul>                                 |
| Social Influences                     | Interpersonal processes that can cause individuals to change their thoughts or behaviours                                | <ul style="list-style-type: none"> <li>• Family physicians hear that radiologists advocate for screening in all women 40-49 and consider doing so themselves</li> </ul>                        |
